# Supplementary material for: Current status of model predictions of volatile organic compounds and impacts on surface ozone predictions during summer in China
Source: Copernicus journal article supplement (doi:10.5194/acp-24-219-2024), 2024-01-10
Supplement: Supplementary file 1 [file acp-24-219-2024-supplement.pdf]

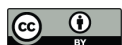

*Supplement of*

## **Current status of model predictions of volatile organic compounds and impacts on surface ozone predictions during summer in China**

**Yongliang She et al.**

*Correspondence to:* Jianlin Hu ([jianlinhu@nuist.edu.cn](mailto:jianlinhu@nuist.edu.cn))

The copyright of individual parts of the supplement might differ from the article licence.

## 7 **S.1 VOCs measurements**

8 In the ATMSYC project, sampling was conducted in both winter and summer.  
9 The VOC measurements from 6 June to 24 August 2018 were employed in this study.  
10 Table S1 shows the locations of 28 sites, along with sampling time and the number of  
11 VOC samples. The methods for sampling and analyses were consistent across sites.  
12 Non-methane hydrocarbons (NMHCs) were collected in 2L stainless steel canisters,  
13 and all canisters were cleaned and evacuated at least three times with zero air before  
14 sampling. During the sampling, flow restrictors were used to guarantee that each  
15 sample lasted for one hour (Lyu et al., 2019; Lyu et al., 2020). Oxygenated VOCs  
16 (OVOCs) were sampled with 2,4-dinitrophenylhydrazine (DNPH) cartridges with O<sub>3</sub>  
17 scrubbers installed in front of them to remove airborne O<sub>3</sub>. The sampling duration of  
18 OVOC was 2 h and the sampling flow rate was fixed at 0.5 L/min. All the DNPH  
19 cartridges were stored in a refrigerator at 4 °C before the chemical analyses (Lyu et  
20 al., 2019; Lyu et al., 2020).

21 The NMHC species were identified and quantified by gas chromatography  
22 coupled with a mass spectrometry detector, electron capture detector, and flame  
23 ionization detector at Hong Kong Polytechnic University (Lyu et al., 2020). The  
24 detection limit, accuracy, and precision for each NMHC were given in (Zhou et al.,  
25 2023), following the U.S. Environmental Protection Agency (U.S. EPA) TO-15  
26 method (Agency, 1999). With outliers removed, 834 valid samples were obtained. The  
27 analyses for the 60 NMHCs were in good agreement with those analyzed by Prof.  
28 Donald Blake's laboratory at the University of California, Irvine (Blake, 2003;  
29 Simpson et al., 2010), with goodness-of-fit (R<sup>2</sup>) values ranging from 0.85-0.97 and  
30 slopes ranging from 0.85-1.24. In addition, HCHO was analyzed by high-performance  
31 liquid chromatography (Lyu et al., 2020). One calibration standard was run for every

32 ten samples to ensure instrument stability, following a previous study (Cheng et al.,  
 33 2014).

### 34 S.2 Supplement figures and tables

35 Table S1. List of sampling sites and periods in the field campaign of ATMSYC  
 36 project.

| Regions       | Cities       | Station code | Start time | End time  | Nos        | Latitude    | Longitude   |
|---------------|--------------|--------------|------------|-----------|------------|-------------|-------------|
| NCP           | Beijing      | BJ-B         | 2 August   | 24 August | 57         | 40°24'28"N  | 116°40'26"E |
|               |              | BJ-U         | 2 August   | 24 August | 57         | 39°58'28"N  | 116°22'13"E |
|               | Shijiazhuang | SJZ-B        | 29 June    | 4 July    | 18         | 37°59'52"N  | 114°30'56"E |
|               |              | SJZ-U        | 29 June    | 4 July    | 17         | 38°02'35"N  | 114°30'15"E |
|               | Ji'nan       | JN-B         | 29 June    | 5 July    | 17         | 36°35'56"N  | 117°02'46"E |
|               |              | JN-U         | 29 June    | 5 July    | 18         | 36°40'23"N  | 117°03'01"E |
| Northwest     | Lanzhou      | LZ-B         | 1 August   | 18 August | 53         | 35°56'35"N  | 104°09'11"E |
|               |              | LZ-U         | 1 August   | 18 August | 52         | 36°06'11"N  | 103°37'48"E |
| YRD           | Shanghai     | SH-B         | 1 August   | 24 August | 60         | 31°31'26"N  | 121°57'32"E |
|               |              | SH-U         | 1 August   | 24 August | 55         | 31°11'27"N  | 121°26'04"E |
| Central China | Wuhan        | WH-B         | 1 August   | 11 August | 42         | 30°21'40"N  | 114°20'10"E |
|               |              | WH-U         | 1 August   | 11 August | 39         | 30°31'50"N  | 114°18'28"E |
|               | Zhengzhou    | ZZ-B         | 29 June    | 4 July    | 17         | 34°51'35"N  | 113°24'24"E |
|               |              | ZZ-U         | 29 June    | 4 July    | 17         | 34°45'12"N  | 113°36'48"E |
| Southwest     | Chengdu      | CD-B         | 6 August   | 20 August | 55         | 30°33'47"N  | 104°16'18"E |
|               |              | CD-U         | 6 August   | 20 August | 58         | 30°37'45"N  | 104°03'50"E |
|               | Guiyang      | GY-B         | 29 June    | 4 July    | 18         | 26°38'28"N  | 106°36'60"E |
|               |              | GY-U         | 29 June    | 4 July    | 17         | 26°34'02"N  | 106°41'60"E |
| PRD           | Guangzhou    | GZ-B         | 29 June    | 4 July    | 17         | 23°39'01"N  | 113°37'28"E |
|               |              | GZ-U         | 29 June    | 4 July    | 17         | 23°08'58"N  | 113°21'28"E |
|               | Shenzhen     | SZ           | 6 June     | 14 June   | 18         | 22°35'47"N  | 113°58'22"E |
|               | Huizhou      | HZ           | 6 June     | 14 June   | 13         | 23°03'10"N  | 114°25'06"E |
|               | Jiangmen     | JM           | 7 June     | 13 June   | 17         | 22°35'01"N  | 113°04'23"E |
|               | Dongguan     | DG           | 6 June     | 13 June   | 15         | 23°03'13"N  | 113°46'55"E |
|               | Foshan       | FS           | 6 June     | 13 June   | 17         | 23°00'09"N  | 113°06'13"E |
|               | Zhaoqing     | ZQ           | 6 June     | 13 June   | 18         | 23°02'46"N  | 112°27'52"E |
|               | Zhongshan    | ZS           | 6 June     | 13 June   | 18         | 22°30'40"N  | 113°24'27"E |
| Zhuhai        | ZH           | 6 June       | 13 June    | 17        | 22°14'19"N | 113°29'44"E |             |

37 Nos: Number of VOC samples. For the sites, B representing the background, and U  
 38 representing the urban, Sites in the PRD except GZ-B belong to urban.

39 Table S2. The specific classification of VOCs in this study

| Species groups | Species types in saprc07tic                                                                                                    | Species included both in observation and simulation                                                                                                                                                 | Remarks                                                                               |
|----------------|--------------------------------------------------------------------------------------------------------------------------------|-----------------------------------------------------------------------------------------------------------------------------------------------------------------------------------------------------|---------------------------------------------------------------------------------------|
| Alkanes        | ALK1                                                                                                                           | ethane                                                                                                                                                                                              | kOH between $2$ and $5 \times 10^2$ ppm <sup>-1</sup> min <sup>-1</sup>               |
|                | ALK2                                                                                                                           | n-propane                                                                                                                                                                                           | kOH between $5 \times 10^2$ and $2.5 \times 10^3$ ppm <sup>-1</sup> min <sup>-1</sup> |
|                | ALK3                                                                                                                           | 1-/i-butene, n-butane, isobutane,                                                                                                                                                                   | kOH between $2.5 \times 10^3$                                                         |
|                | ALK4                                                                                                                           | 2,2-dimethylbutane, 2,2,4-trimethylpentane                                                                                                                                                          | and $5 \times 10^3$ ppm <sup>-1</sup> min <sup>-1</sup>                               |
|                |                                                                                                                                | i-pentane, n-pentane, 2-methylpentane, 3-methylpentane, cyclopentane, n-hexane, n-heptane, methylcyclopentane, 2,4-dimethylpentane, 2,3-dimethylpentane, 2,3,4-trimethylpentane, 2,3-dimethylbutane | kOH between $5 \times 10^3$ and $1 \times 10^4$ ppm <sup>-1</sup> min <sup>-1</sup>   |
| ALK5           | cyclohexane, methylcyclohexane, 2-methylhexane, 3-methylhexane, 2-methylheptane, 3-methylheptane, n-octane, n-nonane, n-decane | kOH > $1 \times 10^4$ ppm <sup>-1</sup> min <sup>-1</sup>                                                                                                                                           |                                                                                       |
| Aromatics      | ARO1                                                                                                                           | ethylbenzene, isopropylbenzene, n-propylbenzene                                                                                                                                                     | kOH < $2 \times 10^4$ ppm <sup>-1</sup> min <sup>-1</sup>                             |
|                | ARO2MN                                                                                                                         | 1,2,3-trimethylbenzene,                                                                                                                                                                             | kOH > $2 \times 10^4$ ppm <sup>-1</sup> min <sup>-1</sup> , minus naphthalene         |
|                |                                                                                                                                | 1,3,5-trimethylbenzene, o-ethyltoluene, 3-ethyltoluene, 4-ethyltoluene, 1,2,4-trimethylbenzene (0.5)                                                                                                |                                                                                       |
|                | TOLU                                                                                                                           | toluene                                                                                                                                                                                             |                                                                                       |
|                | BENZ                                                                                                                           | benzene                                                                                                                                                                                             |                                                                                       |
|                | XYL                                                                                                                            | o-xylene, m/p-xylene                                                                                                                                                                                |                                                                                       |
|                | B124                                                                                                                           | 1,2,4-trimethylbenzene (0.5)                                                                                                                                                                        |                                                                                       |
| Alkenes        | OLE1                                                                                                                           | 1-butene, 1-pentene, 3-methyl-1-butene, 4-methyl-1-pentene                                                                                                                                          | kOH < $7 \times 10^4$ ppm <sup>-1</sup> min <sup>-1</sup> , other than ethene         |
|                | OLE2                                                                                                                           | trans-2-butene, cis-2-butene,                                                                                                                                                                       | kOH > $7 \times 10^4$ ppm <sup>-1</sup> min <sup>-1</sup>                             |
|                |                                                                                                                                | 2-methyl-1-butene, 2-methyl-2-butene, trans-2-pentene, cis-2-pentene, 2-methyl-1-pentene, cyclopentene, styrene                                                                                     |                                                                                       |
|                | ISOP                                                                                                                           | isoprene                                                                                                                                                                                            |                                                                                       |
|                | ETHE                                                                                                                           | ethylene                                                                                                                                                                                            |                                                                                       |
|                | PRPE                                                                                                                           | propene                                                                                                                                                                                             |                                                                                       |
|                | APIN                                                                                                                           | a-pinene                                                                                                                                                                                            |                                                                                       |
|                | BDE13                                                                                                                          | 1,3-butadiene                                                                                                                                                                                       |                                                                                       |
| Alkynes        | ACYE                                                                                                                           | acetylene                                                                                                                                                                                           |                                                                                       |
| HCHO           | HCHO                                                                                                                           | formaldehyde                                                                                                                                                                                        |                                                                                       |

40 kOH: The reaction rate constant between VOCs and Hydroxyl radical (OH).

41 Table S3. Model performance of MDA8 O<sub>3</sub> and NO<sub>2</sub> in the 28 sites from June 6th to August  
 42 24th, 2018

| sites      | MDA8 O <sub>3</sub> (µg/m <sup>3</sup> ) |        |              |             |             | NO <sub>2</sub> (µg/m <sup>3</sup> ) |       |       |      |      |
|------------|------------------------------------------|--------|--------------|-------------|-------------|--------------------------------------|-------|-------|------|------|
|            | OBS                                      | PRE    | NMB          | NME         | R           | OBS                                  | PRE   | NMB   | NME  | R    |
| BJ-B       | 162.84                                   | 165.43 | 0.02         | 0.20        | 0.72        | 24.45                                | 15.49 | -0.37 | 0.40 | 0.40 |
| BJ-U       | 164.44                                   | 193.04 | <b>0.17</b>  | 0.23        | 0.75        | 34.19                                | 29.61 | -0.13 | 0.31 | 0.11 |
| SJZ-B      | 170.29                                   | 168.29 | -0.01        | 0.21        | 0.66        | 25.20                                | 39.46 | 0.57  | 0.63 | 0.19 |
| SJZ-U      | 163.98                                   | 168.29 | 0.03         | 0.22        | 0.64        | 29.70                                | 39.46 | 0.33  | 0.41 | 0.30 |
| JN-B       | 175.43                                   | 161.04 | -0.08        | 0.19        | 0.68        | 21.05                                | 26.08 | 0.24  | 0.41 | 0.46 |
| JN-U       | 167.26                                   | 161.04 | -0.04        | 0.18        | 0.72        | 36.91                                | 26.08 | -0.29 | 0.34 | 0.46 |
| LZ-B       | 118.63                                   | 116.73 | -0.02        | 0.11        | 0.66        | 15.78                                | 6.23  | -0.61 | 0.61 | 0.22 |
| LZ-U       | 165.22                                   | 135.31 | <b>-0.18</b> | <b>0.25</b> | 0.65        | 38.06                                | 20.75 | -0.46 | 0.46 | 0.18 |
| SH-B       | 106.43                                   | 88.93  | <b>-0.16</b> | <b>0.33</b> | 0.57        | 21.04                                | 1.43  | -0.93 | 0.93 | 0.45 |
| SH-U       | 113.56                                   | 136.59 | <b>0.20</b>  | <b>0.29</b> | 0.80        | 23.01                                | 32.99 | 0.43  | 0.47 | 0.70 |
| WH-B       | 140.23                                   | 141.09 | 0.01         | 0.23        | 0.70        | 36.42                                | 37.62 | 0.03  | 0.27 | 0.47 |
| WH-U       | 126.62                                   | 141.09 | 0.11         | 0.25        | 0.72        | 35.46                                | 37.62 | 0.06  | 0.22 | 0.51 |
| ZZ-B       | 150.74                                   | 172.08 | 0.14         | 0.23        | 0.61        | 34.96                                | 36.51 | 0.05  | 0.22 | 0.52 |
| ZZ-U       | 147.25                                   | 158.44 | 0.08         | 0.24        | 0.66        | 39.16                                | 34.23 | -0.13 | 0.22 | 0.49 |
| CD-B       | 114.06                                   | 119.92 | 0.05         | 0.25        | 0.62        | 43.09                                | 30.80 | -0.29 | 0.36 | 0.14 |
| CD-U       | 140.56                                   | 133.25 | -0.05        | <b>0.28</b> | 0.56        | 30.99                                | 59.51 | 0.92  | 0.94 | 0.14 |
| GY-B       | 89.98                                    | 95.00  | 0.06         | 0.15        | 0.82        | 16.76                                | 18.54 | 0.11  | 0.34 | 0.44 |
| GY-U       | 85.49                                    | 95.00  | 0.11         | 0.19        | 0.79        | 30.06                                | 18.54 | -0.38 | 0.39 | 0.67 |
| GZ-B       | 106.09                                   | 121.60 | 0.15         | <b>0.35</b> | <b>0.37</b> | 21.72                                | 12.24 | -0.44 | 0.44 | 0.71 |
| GZ-U       | 115.63                                   | 144.78 | <b>0.25</b>  | <b>0.34</b> | 0.55        | 35.30                                | 23.71 | -0.33 | 0.36 | 0.56 |
| SZ         | 80.73                                    | 112.05 | <b>0.39</b>  | <b>0.50</b> | 0.71        | 20.97                                | 31.38 | 0.50  | 0.52 | 0.67 |
| HZ         | 97.19                                    | 111.21 | 0.15         | <b>0.27</b> | 0.75        | 21.99                                | 19.57 | -0.11 | 0.24 | 0.65 |
| JM         | 104.73                                   | 118.35 | 0.13         | <b>0.28</b> | 0.82        | 28.08                                | 19.39 | -0.31 | 0.34 | 0.54 |
| DG         | 118.77                                   | 139.30 | <b>0.21</b>  | <b>0.35</b> | 0.64        | 32.25                                | 24.93 | -0.23 | 0.27 | 0.62 |
| FS         | 113.21                                   | 148.99 | <b>0.32</b>  | <b>0.44</b> | 0.64        | 33.31                                | 27.79 | -0.17 | 0.28 | 0.51 |
| ZQ         | 109.02                                   | 117.98 | 0.08         | 0.23        | 0.76        | 30.94                                | 12.00 | -0.61 | 0.62 | 0.40 |
| ZS         | 102.66                                   | 134.08 | <b>0.31</b>  | <b>0.42</b> | 0.79        | 12.87                                | 17.42 | 0.35  | 0.49 | 0.65 |
| ZH         | 92.39                                    | 114.00 | <b>0.23</b>  | <b>0.38</b> | 0.72        | 13.71                                | 9.30  | -0.32 | 0.52 | 0.49 |
| Benchmarks |                                          |        | <=±0.15      | <0.25       | >0.5        |                                      |       |       |      |      |

43 OBS: mean observation; PRE: mean prediction; NMB: normalized mean bias; NME:  
 44 normalized mean error; R: the correlation coefficient. The performance criteria for MDA8 O<sub>3</sub>  
 45 were suggested by (Emery et al., 2017). The values that exceed the criteria were highlighted  
 46 in bold.

47 Table S4. Comparison of mean values of O<sub>3</sub>, NO<sub>2</sub> and TVOCs concentrations at 28 sites  
 48 during the study period

| sites | O <sub>3</sub> (µg/m <sup>3</sup> ) |        | NO <sub>2</sub> (µg/m <sup>3</sup> ) |       | TVOCs (ppbv) |       |
|-------|-------------------------------------|--------|--------------------------------------|-------|--------------|-------|
|       | OBS                                 | PRE    | OBS                                  | PRE   | OBS          | PRE   |
| BJ-B  | 139.32                              | 150.78 | 14.85                                | 8.35  | 23.19        | 18.36 |
| BJ-U  | 140.94                              | 188.26 | 23.65                                | 20.62 | 33.24        | 30.45 |
| SJZ-B | 164.56                              | 164.68 | 29.65                                | 14.88 | 35.59        | 14.47 |
| SJZ-U | 150.50                              | 161.58 | 29.19                                | 15.09 | 35.47        | 14.67 |
| JN-B  | 135.33                              | 158.06 | 42.94                                | 11.15 | 53.37        | 12.03 |
| JN-U  | 144.75                              | 161.99 | 41.82                                | 11.13 | 61.93        | 12.07 |
| LZ-B  | 97.59                               | 107.96 | 13.49                                | 3.19  | 33.16        | 5.16  |
| LZ-U  | 129.04                              | 117.69 | 30.92                                | 11.16 | 52.21        | 8.92  |
| SH-B  | 100.19                              | 81.46  | 22.17                                | 0.80  | 12.97        | 3.66  |
| SH-U  | 111.04                              | 120.69 | 21.59                                | 28.62 | 18.79        | 29.72 |
| WH-B  | 141.45                              | 168.78 | 37.37                                | 22.60 | 22.65        | 24.69 |
| WH-U  | 118.03                              | 166.14 | 34.38                                | 22.70 | 30.48        | 25.10 |
| ZZ-B  | 127.76                              | 169.24 | 40.71                                | 17.21 | 29.79        | 15.89 |
| ZZ-U  | 131.35                              | 161.50 | 46.06                                | 14.93 | 28.13        | 13.71 |
| CD-B  | 100.85                              | 119.01 | 37.98                                | 14.55 | 39.43        | 27.64 |
| CD-U  | 130.86                              | 131.87 | 25.09                                | 43.52 | 34.72        | 62.36 |
| GY-B  | 58.18                               | 68.08  | 11.44                                | 8.92  | 26.06        | 9.50  |
| GY-U  | 53.82                               | 66.69  | 25.59                                | 8.77  | 22.83        | 9.41  |
| GZ-B  | 78.29                               | 140.98 | 19.38                                | 7.20  | 15.92        | 12.84 |
| GZ-U  | 88.29                               | 137.19 | 24.12                                | 12.75 | 24.19        | 17.05 |
| SZ    | 89.23                               | 106.51 | 36.27                                | 38.40 | 34.09        | 33.41 |
| HZ    | 66.31                               | 62.82  | 22.62                                | 21.40 | 26.86        | 24.84 |
| JM    | 104.29                              | 100.04 | 29.44                                | 18.48 | 28.68        | 22.02 |
| DG    | 66.71                               | 102.58 | 40.43                                | 29.02 | 32.08        | 25.06 |
| FS    | 68.93                               | 98.16  | 33.29                                | 38.47 | 32.76        | 33.08 |
| ZQ    | 80.24                               | 89.25  | 30.06                                | 12.92 | 31.98        | 22.44 |
| ZS    | 95.78                               | 118.94 | 18.83                                | 23.21 | 27.29        | 23.18 |
| ZH    | 103.82                              | 147.99 | 24.00                                | 17.99 | 28.53        | 20.26 |

49  
50

51 Table S5. The mean, median, maximum (max), minimum (min), and standard deviation (SD)  
 52 values of the ratios and differences (Diff) for 5 VOCs groups, ARO2MN and BENZ at 18  
 53 urban sites, accurate to two places of decimals

|                |        | Alkanes | Alkenes | Aromatics | ARO2MN<br>(aromatics) | BENZ<br>(aromatics) | Alkyne | HCHO  |
|----------------|--------|---------|---------|-----------|-----------------------|---------------------|--------|-------|
| Ratio(pre/obs) | mean   | 0.66    | 0.72    | 1.46      | 0.44                  | 3.29                | 0.53   | 1.83  |
|                | median | 0.59    | 0.69    | 1.41      | 0.32                  | 2.75                | 0.42   | 1.19  |
|                | max    | 1.87    | 2.46    | 3.29      | 1.96                  | 9.01                | 1.50   | 8.70  |
|                | min    | 0.13    | 0.09    | 0.10      | 0.05                  | 0.14                | 0.09   | 0.25  |
|                | SD     | 0.42    | 0.54    | 0.84      | 0.46                  | 1.97                | 0.34   | 1.91  |
| Diff(pre-obs)  | mean   | -5.78   | -3.29   | 1.07      | -0.26                 | 0.42                | -1.23  | 0.58  |
|                | median | -5.42   | -2.17   | 1.61      | -0.18                 | 0.54                | -1.35  | 0.54  |
|                | max    | 14.12   | 3.50    | 6.09      | 0.24                  | 1.28                | 0.87   | 5.57  |
|                | min    | -19.40  | -15.50  | -8.18     | -0.74                 | -2.58               | -2.64  | -8.90 |
|                | SD     | 7.82    | 4.86    | 3.68      | 0.24                  | 0.81                | 0.97   | 2.95  |

54

55 Table S6. Impact of improvement of emission inventory. Median of ratio of predicted to  
 56 observed values for each urban site after adjusting emission coefficients for individual  
 57 species or both of them in MEIC

| Cases in CMAQ        | O <sub>3</sub> | NO <sub>2</sub> | ALK2  | ARO2MN | BENZ  | OLE1  | PRPE  | ACYE  |
|----------------------|----------------|-----------------|-------|--------|-------|-------|-------|-------|
| Base case            | 1.240          | 0.623           | 0.270 | 0.325  | 2.541 | 0.340 | 0.445 | 0.468 |
| case_NO <sub>x</sub> | 1.148          | 0.899           |       |        |       |       |       |       |
| case_ALK2            | 1.243          |                 | 0.789 |        |       |       |       |       |
| case_ARO2MN          | 1.250          |                 |       | 0.863  |       |       |       |       |
| case_BENZ            | 1.240          |                 |       |        | 1.556 |       |       |       |
| case_OLE1            | 1.249          |                 |       |        |       | 0.522 |       |       |
| case_PRPE            | 1.248          |                 |       |        |       |       | 0.688 |       |
| case_ACYE            | 1.241          |                 |       |        |       |       |       | 0.978 |
| case_all             | 1.269          | 0.622           | 0.791 | 0.863  | 1.556 | 0.687 | 0.652 | 0.981 |

58

59

60 Table S7. The mean, median, max, min, and SD values of the ratios for predicted/observed  
 61 TVOCs for 28 sites in base case and eight new cases, accurate to two places of decimals

|             | mean | median | max  | min  | SD   |
|-------------|------|--------|------|------|------|
| Base case   | 0.70 | 0.74   | 1.90 | 0.15 | 0.40 |
| case_NOx    | 0.70 | 0.73   | 1.91 | 0.14 | 0.40 |
| case_ALK2   | 0.75 | 0.79   | 2.04 | 0.16 | 0.42 |
| case_ARO2MN | 0.71 | 0.75   | 1.93 | 0.15 | 0.40 |
| case_BENZ   | 0.69 | 0.73   | 1.87 | 0.14 | 0.39 |
| case_OLE1   | 0.72 | 0.75   | 1.94 | 0.15 | 0.41 |
| case_PRPE   | 0.71 | 0.75   | 1.94 | 0.15 | 0.40 |
| case_ACYE   | 0.74 | 0.78   | 2.00 | 0.15 | 0.42 |
| case_all    | 0.81 | 0.86   | 2.25 | 0.17 | 0.47 |

69 Table S8. The mean, median, max, min, and std values of O<sub>3</sub> changes were calculated for  
 70 eight new cases relative to the base case for 28 sites, accurate to two places of decimals

|             | mean  | median | max   | min     | SD    |
|-------------|-------|--------|-------|---------|-------|
| case_NOx    | 0.02% | 1.01%  | 8.66% | -12.29% | 5.69% |
| case_ALK2   | 0.30% | 0.31%  | 0.54% | 0.13%   | 0.10% |
| case_ARO2MN | 0.82% | 0.68%  | 2.41% | 0.06%   | 0.54% |
| case_BENZ   | 0.01% | 0.00%  | 0.09% | -0.07%  | 0.04% |
| case_OLE1   | 0.79% | 0.76%  | 1.78% | 0.19%   | 0.40% |
| case_PRPE   | 0.63% | 0.55%  | 1.81% | 0.14%   | 0.35% |
| case_ACYE   | 0.01% | 0.02%  | 0.05% | -0.03%  | 0.02% |
| case_all    | 2.51% | 2.32%  | 6.27% | 0.62%   | 1.28% |



78 Table S9. Model performance of temperature (T2) and relative humidity (RH) in the 28 sites  
 79 from June 6th to August 24th, 2018

| sites      | T2 (°C) |       |                |             |      | RH (%) |       |        |       |       |
|------------|---------|-------|----------------|-------------|------|--------|-------|--------|-------|-------|
|            | OBS     | PRE   | MB             | ME          | RMSE | OBS    | PRE   | MB     | ME    | RMSE  |
| BJ-B       | 26.51   | 26.63 | 0.12           | 1.27        | 1.61 | 74.99  | 61.60 | -13.39 | 14.11 | 16.50 |
| BJ-U       | 27.46   | 29.51 | <b>2.05</b>    | <b>2.09</b> | 2.58 | 67.23  | 49.64 | -17.59 | 17.66 | 19.27 |
| SJZ-B      | 28.56   | 29.38 | 0.83           | 1.34        | 1.63 | 65.24  | 51.28 | -13.96 | 14.09 | 16.03 |
| SJZ-U      | 28.07   | 29.38 | <b>1.32</b>    | 1.60        | 2.05 | 66.23  | 51.28 | -14.95 | 14.97 | 17.32 |
| JN-B       | 28.11   | 28.45 | 0.34           | 1.08        | 1.49 | 66.56  | 61.32 | -5.23  | 7.32  | 9.75  |
| JN-U       | 28.11   | 28.45 | 0.34           | 1.08        | 1.49 | 66.56  | 61.32 | -5.23  | 7.32  | 9.75  |
| LZ-B       | 19.41   | 19.00 | -0.41          | 0.85        | 1.09 | 71.23  | 65.58 | -5.66  | 7.64  | 9.14  |
| LZ-U       | 23.36   | 22.24 | <b>-1.13</b>   | 1.29        | 1.53 | 58.30  | 52.92 | -5.37  | 6.45  | 8.15  |
| SH-B       | 27.21   | 23.55 | <b>-3.66</b>   | <b>3.93</b> | 4.62 | 85.48  | 92.74 | 7.26   | 8.92  | 10.62 |
| SH-U       | 28.40   | 28.94 | <b>0.54</b>    | 0.99        | 1.22 | 75.48  | 66.03 | -9.46  | 9.75  | 10.83 |
| WH-B       | 29.19   | 29.25 | 0.07           | 0.91        | 1.20 | 75.27  | 70.62 | -4.65  | 6.25  | 8.04  |
| WH-U       | 29.19   | 29.25 | 0.07           | 0.91        | 1.20 | 75.27  | 70.62 | -4.65  | 6.25  | 8.04  |
| ZZ-B       | 29.05   | 30.05 | <b>1.00</b>    | 1.17        | 1.50 | 65.88  | 54.92 | -10.96 | 11.24 | 13.04 |
| ZZ-U       | 29.25   | 29.42 | 0.17           | 1.01        | 1.28 | 65.69  | 59.09 | -6.60  | 9.56  | 11.06 |
| CD-B       | 25.90   | 26.21 | 0.31           | 1.00        | 1.27 | 87.03  | 77.37 | -9.66  | 9.95  | 12.23 |
| CD-U       | 26.10   | 27.13 | <b>1.03</b>    | 1.36        | 1.65 | 82.16  | 72.21 | -9.94  | 10.53 | 12.48 |
| GY-B       | 22.93   | 21.84 | <b>-1.10</b>   | 1.12        | 1.32 | 76.95  | 86.56 | 9.61   | 9.61  | 10.56 |
| GY-U       | 24.12   | 21.84 | <b>-2.28</b>   | <b>2.28</b> | 2.42 | 75.85  | 86.56 | 10.71  | 10.71 | 11.69 |
| GZ-B       | 27.74   | 27.20 | -0.54          | 0.89        | 1.11 | 87.30  | 81.71 | -5.59  | 6.25  | 7.98  |
| GZ-U       | 28.12   | 31.27 | <b>3.15</b>    | <b>3.15</b> | 3.38 | 84.48  | 62.21 | -22.27 | 22.27 | 23.17 |
| SZ         | 28.38   | 30.53 | <b>2.15</b>    | <b>2.20</b> | 2.35 | 83.16  | 65.96 | -17.20 | 17.20 | 17.84 |
| HZ         | 27.95   | 28.00 | 0.05           | 0.89        | 1.12 | 83.42  | 79.16 | -4.26  | 5.79  | 7.04  |
| JM         | 28.74   | 28.52 | -0.22          | 0.79        | 0.98 | 83.56  | 78.71 | -4.85  | 6.23  | 7.55  |
| DG         | 28.38   | 31.36 | <b>2.98</b>    | <b>2.98</b> | 3.15 | 81.59  | 62.09 | -19.50 | 19.50 | 20.42 |
| FS         | 29.03   | 31.80 | <b>2.77</b>    | <b>2.77</b> | 2.93 | 79.31  | 60.25 | -19.06 | 19.06 | 19.74 |
| ZQ         | 27.92   | 28.04 | 0.12           | 0.91        | 1.06 | 84.76  | 80.73 | -4.04  | 5.65  | 6.86  |
| ZS         | 28.63   | 30.86 | <b>2.23</b>    | <b>2.24</b> | 2.41 | 86.39  | 65.91 | -20.48 | 20.48 | 21.21 |
| ZH         | 28.42   | 28.54 | 0.13           | 0.98        | 1.20 | 82.75  | 87.53 | 4.78   | 7.02  | 8.55  |
| Benchmarks |         |       | $\leq \pm 0.5$ | $\leq 2.0$  |      |        |       |        |       |       |

80 RMSE: root mean square error. The performance criteria for T2 were suggested by (Emery et  
 81 al., 2001). The values that exceed the criteria were highlighted in bold.

82

83 Table S10. Model performance of wind speed (WS) and wind direction (WD) in the 28 sites

84 from June 6th to August 24th, 2018

| sites      | WS (m/s) |      |                |             |             | WD (°) |        |               |               |       |
|------------|----------|------|----------------|-------------|-------------|--------|--------|---------------|---------------|-------|
|            | OBS      | PRE  | MB             | ME          | RMSE        | OBS    | PRE    | MB            | ME            | RMSE  |
| BJ-B       | 1.75     | 2.67 | <b>0.92</b>    | 0.97        | 1.19        | 192.45 | 129.46 | <b>-62.99</b> | <b>67.84</b>  | 80.15 |
| BJ-U       | 1.82     | 2.43 | <b>0.61</b>    | 0.74        | 0.95        | 130.57 | 144.46 | <b>13.88</b>  | <b>38.27</b>  | 51.37 |
| SJZ-B      | 1.73     | 2.83 | <b>1.10</b>    | 1.15        | 1.34        | 165.69 | 155.74 | -9.95         | <b>37.99</b>  | 52.44 |
| SJZ-U      | 2.31     | 2.83 | <b>0.53</b>    | 0.70        | 0.88        | 180.14 | 155.74 | <b>-24.40</b> | <b>45.03</b>  | 60.91 |
| JN-B       | 3.22     | 3.76 | <b>0.54</b>    | 0.82        | 0.99        | 142.89 | 146.54 | 3.65          | 19.84         | 25.48 |
| JN-U       | 3.22     | 3.76 | <b>0.54</b>    | 0.82        | 0.99        | 142.89 | 146.54 | 3.65          | 19.84         | 25.48 |
| LZ-B       | 2.59     | 3.24 | <b>0.65</b>    | 0.79        | 0.92        | 183.44 | 147.74 | <b>-35.71</b> | <b>45.89</b>  | 66.64 |
| LZ-U       | 1.47     | 2.70 | <b>1.23</b>    | 1.23        | 1.39        | 124.15 | 130.88 | 6.74          | <b>42.11</b>  | 53.33 |
| SH-B       | 3.99     | 6.14 | <b>2.15</b>    | <b>2.16</b> | <b>2.59</b> | 124.58 | 122.10 | -2.48         | 18.50         | 27.98 |
| SH-U       | 0.39     | 3.69 | <b>3.30</b>    | <b>3.30</b> | <b>3.52</b> | 66.66  | 129.84 | <b>63.18</b>  | <b>65.19</b>  | 77.48 |
| WH-B       | 3.01     | 2.54 | -0.47          | 0.65        | 0.81        | 157.99 | 142.73 | <b>-15.26</b> | <b>46.70</b>  | 67.92 |
| WH-U       | 3.01     | 2.54 | -0.47          | 0.65        | 0.81        | 157.99 | 142.73 | <b>-15.26</b> | <b>46.70</b>  | 67.92 |
| ZZ-B       | 1.99     | 3.04 | <b>1.05</b>    | 1.11        | 1.46        | 144.26 | 135.84 | -8.42         | <b>30.04</b>  | 38.62 |
| ZZ-U       | 2.58     | 3.22 | <b>0.65</b>    | 0.81        | 1.14        | 141.91 | 136.46 | -5.45         | 29.11         | 42.43 |
| CD-B       | 2.03     | 2.21 | 0.18           | 0.53        | 0.71        | 142.02 | 117.14 | <b>-24.87</b> | <b>49.27</b>  | 60.78 |
| CD-U       | 1.40     | 2.02 | <b>0.62</b>    | 0.73        | 0.83        | 163.73 | 149.16 | <b>-14.57</b> | <b>41.82</b>  | 52.33 |
| GY-B       | 2.66     | 3.34 | <b>0.68</b>    | 0.87        | 1.15        | 141.62 | 154.37 | <b>12.75</b>  | <b>30.86</b>  | 42.07 |
| GY-U       | 2.00     | 3.34 | <b>1.34</b>    | 1.45        | 1.85        | 151.02 | 154.37 | 3.36          | <b>32.10</b>  | 45.16 |
| GZ-B       | 1.61     | 2.63 | <b>1.03</b>    | 1.10        | 1.39        | 126.01 | 139.07 | <b>13.07</b>  | <b>47.50</b>  | 61.43 |
| GZ-U       | 1.93     | 2.74 | <b>0.81</b>    | 0.91        | 1.13        | 147.31 | 139.80 | -6.96         | <b>44.63</b>  | 58.13 |
| SZ         | 2.35     | 3.37 | <b>1.02</b>    | 1.13        | 1.35        | 155.20 | 159.66 | 4.46          | 24.36         | 32.15 |
| HZ         | 2.48     | 3.00 | <b>0.52</b>    | 0.70        | 0.93        | 146.88 | 137.97 | -8.91         | 26.70         | 34.97 |
| JM         | 3.04     | 3.04 | 0.00           | 0.68        | 0.81        | 155.96 | 163.82 | 7.87          | 27.65         | 39.23 |
| DG         | 3.00     | 3.18 | 0.18           | 0.56        | 0.67        | 136.78 | 149.56 | <b>12.79</b>  | 23.61         | 31.29 |
| FS         | 2.75     | 3.02 | 0.27           | 0.62        | 0.74        | 149.55 | 153.86 | 4.32          | <b>32.81</b>  | 42.51 |
| ZQ         | 1.60     | 2.64 | <b>1.04</b>    | 1.06        | 1.23        | 122.24 | 156.20 | <b>33.97</b>  | <b>56.66</b>  | 65.52 |
| ZS         | 2.53     | 3.29 | <b>0.76</b>    | 0.80        | 0.96        | 144.01 | 158.70 | <b>14.69</b>  | 20.44         | 29.20 |
| ZH         | 3.74     | 4.96 | <b>1.22</b>    | 1.27        | 1.53        | 159.18 | 156.30 | -2.88         | 22.25         | 31.82 |
| Benchmarks |          |      | $\leq \pm 0.5$ | $\leq 2.0$  | $\leq 2.0$  |        |        | $\leq \pm 10$ | $\leq \pm 30$ |       |

85 The performance criteria for WS and WD were suggested by (Emery et al., 2001). The values

86 that exceed the criteria were highlighted in bold.

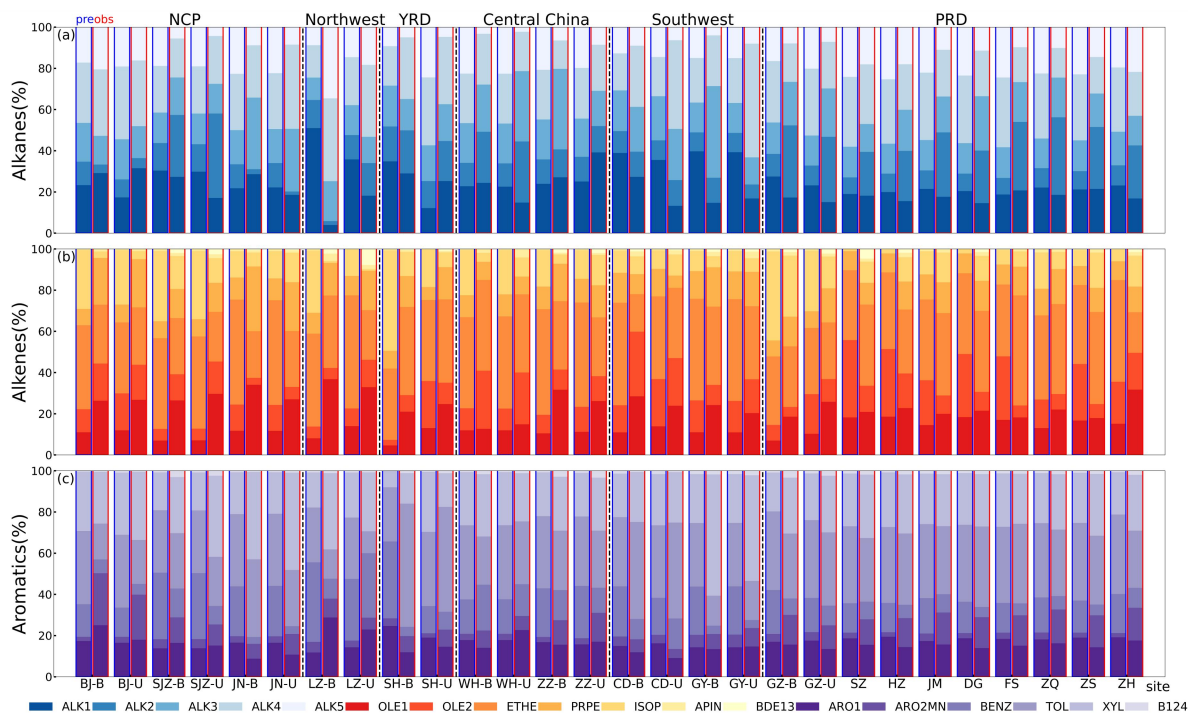

87  
 88 Figure S1. Percentage of predicted and observed VOCs of specific species at 28 sites during  
 89 the study period. For each site, on the left are prediction values with blue edge, and on the  
 90 right are observation values with red edge (a) Alkanes, (b) Alkenes, (c) Aromatics.

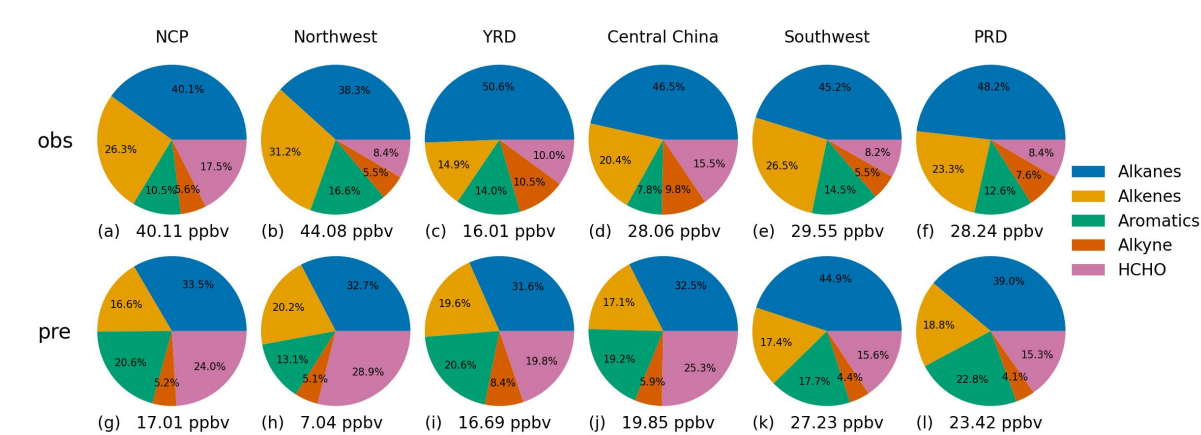

91  
 92 Figure S2. Observed (a-f) and predicted (g-l) values of different VOCs species groups by  
 93 regional average. TVOCs concentration of each region is shown at the bottom.

94

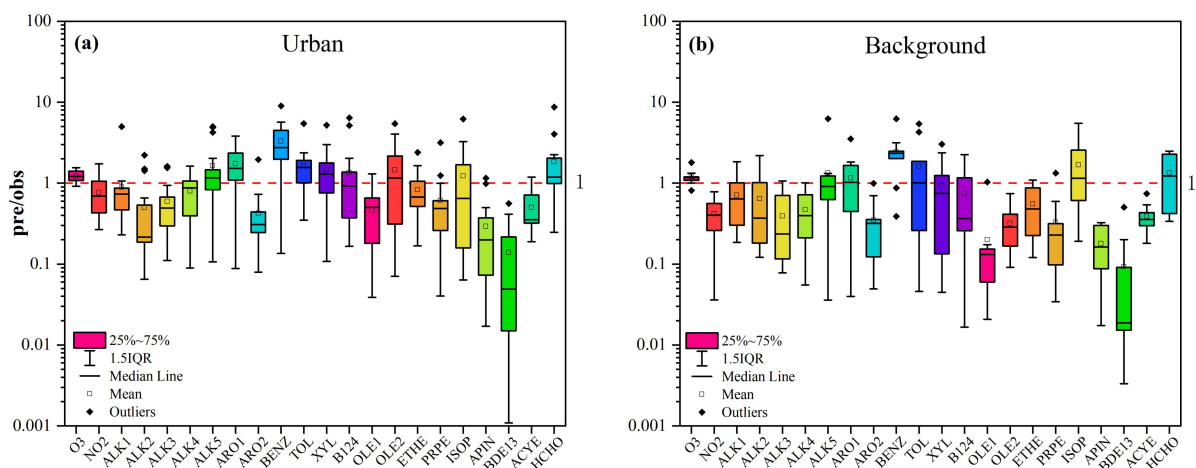

95  
 96 Figure S3. Ratio (pre/obs) of O<sub>3</sub>, NO<sub>2</sub> and different VOCs species at (a) urban sites (18 sites)  
 97 and (b) background sites (10 sites).

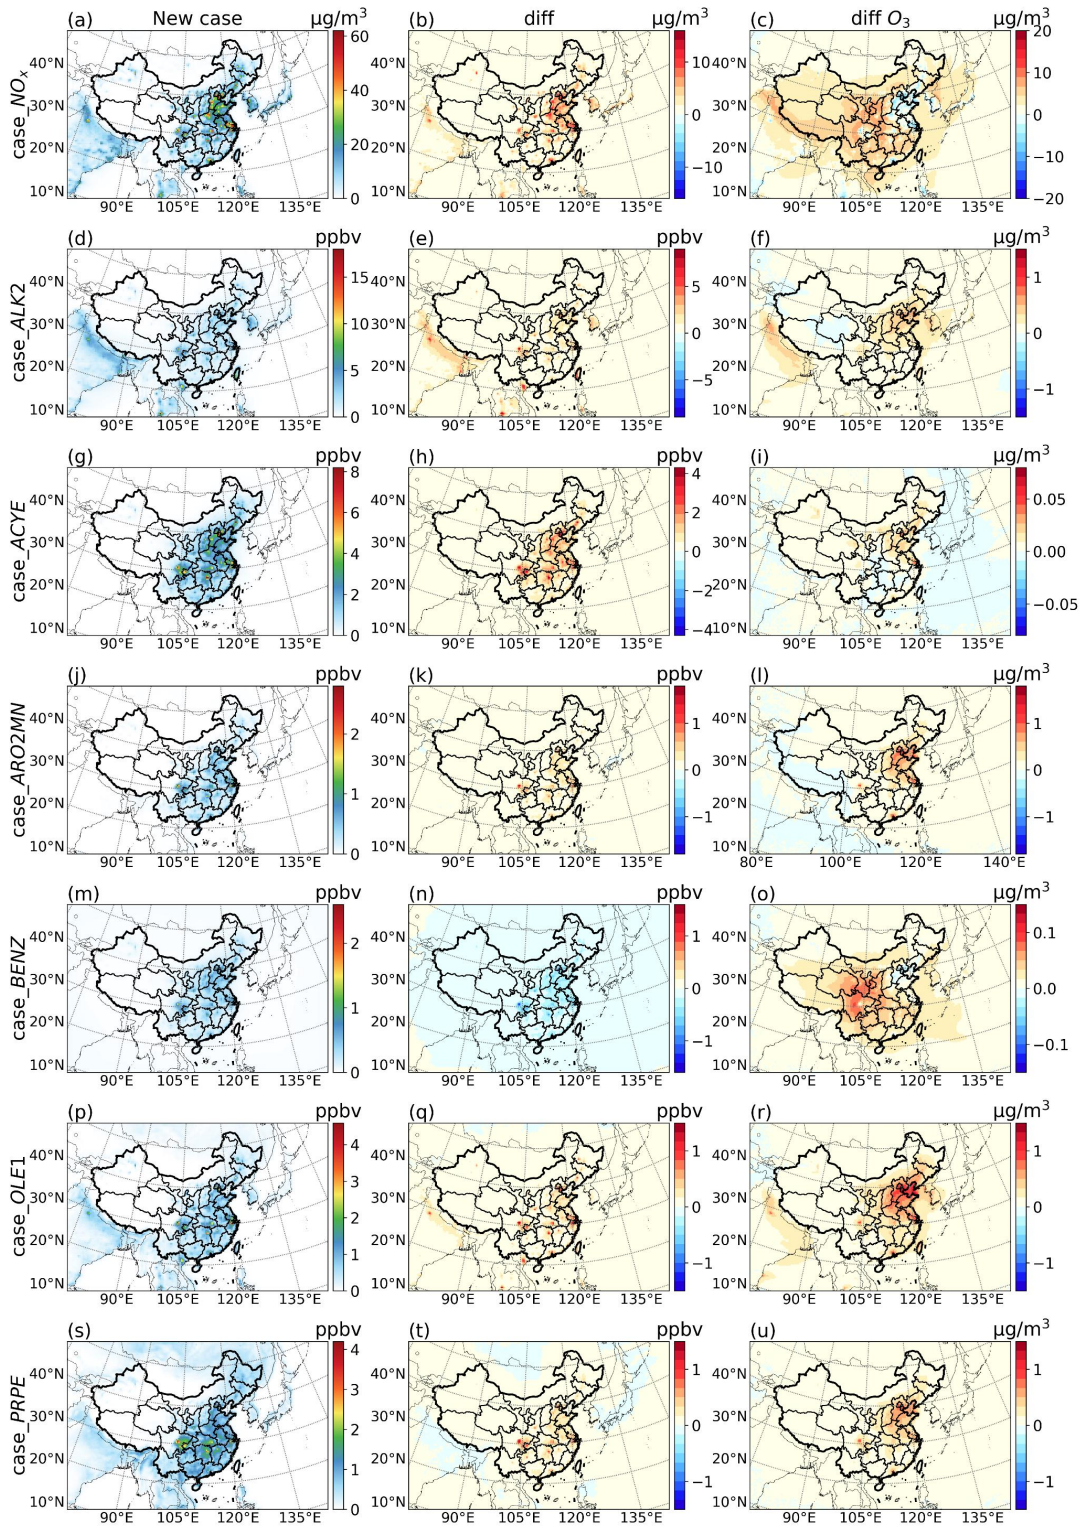

98  
99

Figure S4. The difference between the predicted concentration of seven new cases and base case, and the impact on O<sub>3</sub> concentration from June 6th to August 24th in 2018. Concentration of NO<sub>2</sub> is shown in case\_NO<sub>x</sub>.

100  
101

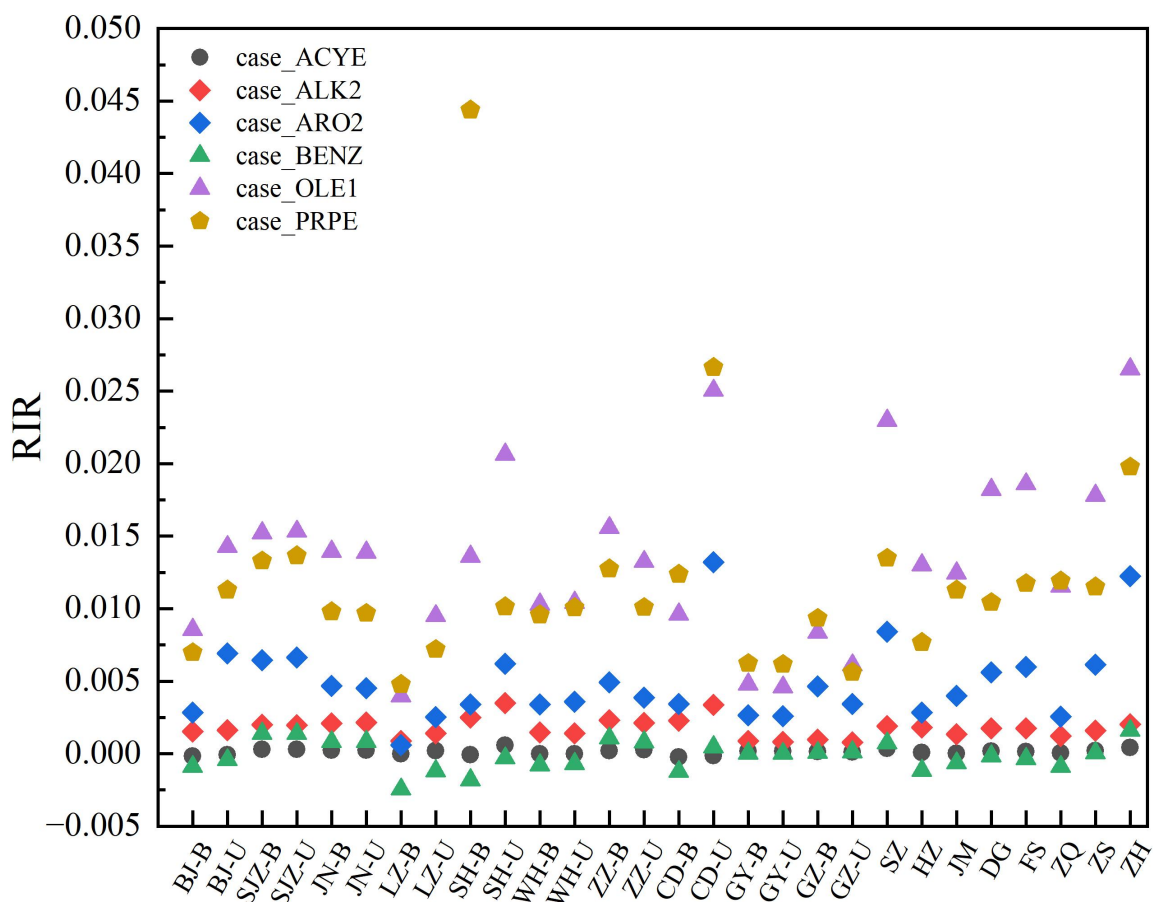

102 Figure S5. Relative Incremental Reactivity (RIR) of 6 VOCs at 28 sites during the study  
 103 period. Each dot represents the RIR of the specific VOCs corresponding to the case at that  
 104 site.  
 105

106 **References**  
 107

108 Agency, U. S. E. P.: Air method, toxic organics-15 (TO-15): Compendium of methods for the determination of  
 109 toxic organic compounds in ambient air, Second Edition: Determination of volatile organic compounds  
 110 (VOCs) in air collected in specially-prepared canisters and analyzed by gas chromatography/mass  
 111 spectrometry (GC/MS). EPA 625/R-96/010b, United States Environmental Protection Agency, available  
 112 at: <https://www.epa.gov/amtic/compendium-methods-determination-toxic-organic-compounds-ambient-air>,  
 113 1999  
 114 Blake, N. J.: NMHCs and halocarbons in Asian continental outflow during the Transport and Chemical  
 115 Evolution over the Pacific (TRACE-P) Field Campaign: Comparison With PEM-West B, *J. Geophys. Res.*,  
 116 108, e2002JD003367, 10.1029/2002jd003367, 2003.  
 117 Cheng, Y., Lee, S. C., Huang, Y., Ho, K. F., Ho, S. S. H., Yau, P. S., Louie, P. K. K., and Zhang, R. J.: Diurnal  
 118 and seasonal trends of carbonyl compounds in roadside, urban, and suburban environment of Hong Kong,  
 119 *Atmos. Environ.*, 89, 43-51, 10.1016/j.atmosenv.2014.02.014, 2014.  
 120 Emery, C., Edward, T., and Yarwood, G.: Enhanced meteorological modeling and performance evaluation for  
 121 two Texas episodes, Report to the Texas Natural Resources Conservation Commission, ENVIRON,  
 122 International Corp, Novato, CA, available at:  
 123 <http://www.tceq.state.tx.us/assets/public/implementation/air/am/contracts/reports/mm/EnhancedMetModeli>

124 [ngAndPerformanceEvaluation.pdf](#), 2001.

125 Emery, C., Liu, Z., Russell, A. G., Odman, M. T., Yarwood, G., and Kumar, N.: Recommendations on statistics  
126 and benchmarks to assess photochemical model performance, *J Air Waste Manag Assoc*, 67, 582-598,  
127 10.1080/10962247.2016.1265027, 2017.

128 Lyu, X., Wang, N., Guo, H., Xue, L., Jiang, F., Zeren, Y., Cheng, H., Cai, Z., Han, L., and Zhou, Y.: Causes of a  
129 continuous summertime O<sub>3</sub> pollution event in Jinan, a central city in the North China Plain, *Atmos. Chem.*  
130 *Phys.*, 19, 3025-3042, 10.5194/acp-19-3025-2019, 2019.

131 Lyu, X., Guo, H., Wang, Y., Zhang, F., Nie, K., Dang, J., Liang, Z., Dong, S., Zeren, Y., Zhou, B., Gao, W., Zhao,  
132 S., and Zhang, G.: Hazardous volatile organic compounds in ambient air of China, *Chemosphere*, 246,  
133 125731, 10.1016/j.chemosphere.2019.125731, 2020.

134 Simpson, I. J., Blake, N. J., Barletta, B., Diskin, G. S., Fuelberg, H. E., Gorham, K., Huey, L. G., Meinardi, S.,  
135 Rowland, F. S., Vay, S. A., Weinheimer, A. J., Yang, M., and Blake, D. R.: Characterization of trace gases  
136 measured over Alberta oil sands mining operations: 76 speciated C<sub>2</sub>-C<sub>10</sub> volatile organic compounds  
137 (VOCs), CO<sub>2</sub>, CH<sub>4</sub>, CO, NO, NO<sub>2</sub>, NO<sub>y</sub>, O<sub>3</sub> and SO<sub>2</sub>, *Atmos. Chem. Phys.*, 10, 11931-11954,  
138 10.5194/acp-10-11931-2010, 2010.

139 Zhou, B., Guo, H., Zeren, Y., Wang, Y., Lyu, X., Wang, B., and Wang, H.: An Observational Constraint of VOC  
140 Emissions for Air Quality Modeling Study in the Pearl River Delta Region, *J. Geophys. Res. Atmos.*, 128,  
141 e2022JD038122, 10.1029/2022jd038122, 2023.

142
